# Supplementary material
Source: PubMed Central journal article supplement (PMC2930590)
Supplement: 1005101107_pnas.201005101SI.pdf [file 1005101107_pnas.201005101SI.pdf]

# Supporting Information

Meng et al. 10.1073/pnas.1005101107

## SI Materials and Methods

**Immunostaining for PER2 in Cells.** Primary lung fibroblasts were prepared from WT or PER2::Luc transgenic mice as described previously (1). WT lung fibroblasts grown on coverslips were synchronized by 100 nM Dex for 1 h. Cells were then changed to normal culture medium with DMSO or CK1 inhibitor compounds. To decide the peak and trough time of the endogenous PER2 oscillation, parallel dishes of cells went through the same Dex synchronization and were then changed to recording medium for PMT photon counting. Eight hours (peak) or 19 h (trough) later, cells were fixed for indirect immunofluorescence as described previously (1). To evaluate nuclear accumulation and clearance of PER2, semiquantification of fluorescence intensity in grayscale was measured using McMaster Biophotonics Facility Image J software. Results were expressed as relative nuclear intensity  $\pm$  SEM. Overall, approximately 30 individual cells from three independent experiments were counted.

**CK1 $\epsilon^{\text{tau}}$  Homology Modeling.** A CK1 $\epsilon^{\text{tau}}$  homology model was constructed by superimposing the structure of human CK1 $\delta$  (1CKI.pdb) (2) onto the *Schizosaccharomyces pombe* CK1-ATP-bound structure (1CSN.pdb) (3) using the secondary-structure alignment tool (4) in the program Coot (5). The procedure was then repeated with the PKA-peptide inhibitor cocomplex structure (2CPK.pdb)

(6) and compared against the CDK2-peptide substrate structure (1QMZ.pdb) (7) to ensure proper positioning of the peptide group in the catalytic cleft. The seven residues in the catalytic kinase domain that differ between CK1 $\epsilon$  and CK1 $\delta$  were then mutated to reflect the  $\epsilon$  sequence and the side chain conformations were minimized using Coot. The same procedure was followed for the  $\tau$  R178C mutant. The molecular surface of the resulting ATP-bound, CK1 $\epsilon$  homology model was then created using an internal structural visualization program, MoViT. (Pfizer) Docking studies of the energy minimized structures of PF-670462 and PF-4800567 in the ATP-binding pocket of the CK1 $\epsilon$  homology model were conducted using the MoViT software.

**CK1 $\epsilon$  and CK1 $\epsilon^{\text{tau}}$  in Vitro Kinase Assay.** The CK1 $\epsilon$  and CK1 $\epsilon^{\text{tau}}$  kinase assays were performed in a 40- $\mu$ L final volume in buffer containing 50 mM Tris, pH 7.5, 10 mM MgCl<sub>2</sub>, 1 mM DTT, 100  $\mu$ g/mL BSA with 10  $\mu$ M ATP, 2.5 nM CK1 $\epsilon$  WT (or 50 nM CK1 $\epsilon^{\text{tau}}$ ), and 42  $\mu$ M peptide substrate PLSRTLpSVASLPGL (8) in the presence of 1  $\mu$ L of either inhibitor or 4% dimethyl sulfoxide (negative control). The reaction was incubated for 90 min at 27  $^{\circ}$ C; detection was carried out as described for the Kinase-Glo Assay (Promega). Luminescent output was measured on the Perkin-Elmer Envision plate reader (PerkinElmer). The results from three independent experiments were conducted and used for statistical analysis.

1. Meng QJ, et al. (2008) Ligand modulation of REV-ERB $\alpha$  function resets the peripheral circadian clock in a phasic manner. *J Cell Sci* 121:3629–3635.
2. Longenecker KL, Roach PJ, Hurley TD (1996) Three-dimensional structure of mammalian casein kinase I: Molecular basis for phosphate recognition. *J Mol Biol* 257:618–631.
3. Xu RM, Carmel G, Sweet RM, Kuret J, Cheng X (1995) Crystal structure of casein kinase-1, a phosphate-directed protein kinase. *EMBO J* 14:1015–1023.
4. Krissinel E, Henrick K (2004) Secondary-structure matching (SSM), a new tool for fast protein structure alignment in three dimensions. *Acta Crystallogr D Biol Crystallogr* 60: 2256–2268.
5. Emsley P, Cowtan K (2004) Coot: Model-building tools for molecular graphics. *Acta Crystallogr D Biol Crystallogr* 60:2126–2132.
6. Knighton DR, et al. (1991) Structure of a peptide inhibitor bound to the catalytic subunit of cyclic adenosine monophosphate-dependent protein kinase. *Science* 253: 414–420.
7. Brown NR, et al. (1999) Effects of phosphorylation of threonine 160 on cyclin-dependent kinase 2 structure and activity. *J Biol Chem* 274:8746–8756.
8. Flotow H, et al. (1990) Phosphate groups as substrate determinants for casein kinase I action. *J Biol Chem* 265:14264–14269.
